# Supplementary material for: An Exploratory Study on the Physical Activity Health Paradox—Musculoskeletal Pain and Cardiovascular Load during Work and Leisure in Construction and Healthcare Workers
Source: MDPI journal article supplement (doi:10.3390/ijerph19052751), 2022-02-26
Supplement: s1 [file s1]

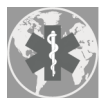

## Supplementary File

**Table S1.** Models describing the association between time spent  $\geq 20$  %HRR and overall musculoskeletal pain (scale 0–27); stratified by VO<sub>2</sub>max, BMI, control of work pacing, and occupational sector. Associations with  $p < 0.05$  are marked in bold.

| 20% HRR                                                              | VO <sub>2</sub> max < 34.8<br>n = 36 |         |                | VO <sub>2</sub> max $\geq$ 34.8<br>n = 36 |              |                        |
|----------------------------------------------------------------------|--------------------------------------|---------|----------------|-------------------------------------------|--------------|------------------------|
|                                                                      | mean                                 | $\beta$ | (95% CI)       | mean                                      | $\beta$      | (95% CI)               |
| Intercept                                                            |                                      | 3.60    | (-0.89 – 8.04) |                                           | <b>3.91</b>  | <b>(1.42 – 6.41)</b>   |
| Time                                                                 |                                      | 0.23    | (-0.11 – 0.58) |                                           | -0.24        | (-0.52 – 0.04)         |
| Awake/Sleep ( <i>ilr</i> <sub>1</sub> )                              | -0.60                                | -1.98   | (-9.54 – 5.51) | -0.54                                     | -1.53        | (-5.65 – 2.59)         |
| Work/Leisure ( <i>ilr</i> <sub>2</sub> )                             | -0.37                                | -3.77   | (-9.13 – 1.55) | -0.41                                     | -0.16        | (-1.96 – 1.65)         |
| $\geq 20$ %HRR Work/<20 %HRR Work ( <i>ilr</i> <sub>3</sub> )        | 0.91                                 | 0.19    | (-2.87 – 3.25) | 0.66                                      | 0.45         | (-0.96 – 1.87)         |
| $\geq 20\%$ HRR Leisure/<20 %HRR Leisure ( <i>ilr</i> <sub>4</sub> ) | 0.11                                 | -0.81   | (-3.24 – 1.58) | 0.07                                      | <b>-2.54</b> | <b>(-4.83 – -0.27)</b> |

  

| 20% HRR                                                              | BMI <sup>†</sup> < 25<br>n = 35 |              |                        | BMI <sup>†</sup> $\geq$ 25<br>n = 37 |             |                      |
|----------------------------------------------------------------------|---------------------------------|--------------|------------------------|--------------------------------------|-------------|----------------------|
|                                                                      | mean                            | $\beta$      | (95% CI)               | mean                                 | $\beta$     | (95% CI)             |
| Intercept                                                            |                                 | <b>3.36</b>  | <b>(0.48 – 6.23)</b>   |                                      | <b>4.48</b> | <b>(0.68 – 8.27)</b> |
| Time                                                                 |                                 | 0.07         | (-0.24 – 0.37)         |                                      | -0.05       | (-0.38 – 0.27)       |
| Awake/Sleep ( <i>ilr</i> <sub>1</sub> )                              | -0.56                           | -1.14        | (-5.59 – 3.28)         | -0.57                                | -1.34       | (-7.66 – 4.98)       |
| Work/Leisure ( <i>ilr</i> <sub>2</sub> )                             | -0.51                           | -0.85        | (-3.58 – 1.88)         | -0.29                                | -1.39       | (-3.99 – 1.22)       |
| $\geq 20$ %HRR Work/<20 %HRR Work ( <i>ilr</i> <sub>3</sub> )        | 0.79                            | 0.16         | (-1.54 – 1.86)         | 0.77                                 | 1.58        | (-0.39 – 3.58)       |
| $\geq 20\%$ HRR Leisure/<20 %HRR Leisure ( <i>ilr</i> <sub>4</sub> ) | 0.06                            | <b>-2.85</b> | <b>(-5.40 – -0.33)</b> | 0.12                                 | -1.39       | (-3.76 – 0.97)       |

  

| 20% HRR                                                              | Control of work pacing < 2.75<br>n = 32 |         |                 | Control of work pacing $\geq$ 2.75<br>n = 38 |             |                      |
|----------------------------------------------------------------------|-----------------------------------------|---------|-----------------|----------------------------------------------|-------------|----------------------|
|                                                                      | mean                                    | $\beta$ | (95% CI)        | mean                                         | $\beta$     | (95% CI)             |
| Intercept                                                            |                                         | 4.77    | (-0.44 – 9.97)  |                                              | <b>3.35</b> | <b>(0.43 – 6.28)</b> |
| Time                                                                 |                                         | -0.14   | (-0.45 – 0.16)  |                                              | 0.23        | (-0.08 – 0.54)       |
| Awake/Sleep ( <i>ilr</i> <sub>1</sub> )                              | -0.61                                   | -2.67   | (-11.33 – 6.01) | -0.53                                        | -0.69       | (-5.05 – 3.66)       |
| Work/Leisure ( <i>ilr</i> <sub>2</sub> )                             | -0.48                                   | -1.40   | (-4.81 – 2.01)  | -0.32                                        | -0.94       | (-3.99 – 2.12)       |
| $\geq 20$ %HRR Work/<20 %HRR Work ( <i>ilr</i> <sub>3</sub> )        | 1.09                                    | 0.13    | (-2.40 – 2.68)  | 0.49                                         | 1.10        | (-0.67 – 2.87)       |
| $\geq 20\%$ HRR Leisure/<20 %HRR Leisure ( <i>ilr</i> <sub>4</sub> ) | 0.15                                    | -3.62   | (-7.67 – 0.40)  | 0.06                                         | -1.08       | (-3.02 – 0.85)       |

  

| 20% HRR                                                              | Construction<br>n = 35 |             |                      | Healthcare<br>n = 37 |             |                      |
|----------------------------------------------------------------------|------------------------|-------------|----------------------|----------------------|-------------|----------------------|
|                                                                      | mean                   | $\beta$     | (95% CI)             | mean                 | $\beta$     | (95% CI)             |
| Intercept                                                            |                        | <b>3.56</b> | <b>(0.65 – 6.47)</b> |                      | <b>4.66</b> | <b>(0.63 – 8.69)</b> |
| Time                                                                 |                        | 0.07        | (-0.22 – 0.37)       |                      | -0.07       | (-0.42 – 0.27)       |
| Awake/Sleep ( <i>ilr</i> <sub>1</sub> )                              | 0.54                   | -0.76       | (-6.11 – 4.58)       | -0.59                | -0.04       | (-6.25 – 6.19)       |
| Work/Leisure ( <i>ilr</i> <sub>2</sub> )                             | -0.30                  | 0.90        | (-1.60 – 3.41)       | -0.48                | -2.20       | (-5.49 – 1.09)       |
| $\geq 20$ %HRR Work/<20 %HRR Work ( <i>ilr</i> <sub>3</sub> )        | 0.87                   | 1.20        | (-0.88 – 3.27)       | 0.69                 | 1.11        | (-0.72 – 2.96)       |
| $\geq 20\%$ HRR Leisure/<20 %HRR Leisure ( <i>ilr</i> <sub>4</sub> ) | 0.22                   | -0.86       | (-3.17 – 1.43)       | -0.04                | -1.52       | (-4.47 – 1.40)       |

¥ BMI (Body mass index)

**Table S2.** Models describing the association between time spent  $\geq 30$  %HRR and overall musculoskeletal pain (scale 0–27); stratified by VO<sub>2</sub>max, BMI, control of work pacing, and occupational sector. Associations with  $p < 0.05$  are marked in bold.

|                                                               |       |             | VO <sub>2</sub> max < 34.8   |       | VO <sub>2</sub> max ≥ 34.8   |                       |
|---------------------------------------------------------------|-------|-------------|------------------------------|-------|------------------------------|-----------------------|
|                                                               |       |             | n = 36                       |       | n = 36                       |                       |
| 30% HRR                                                       | mean  | β           | (95% CI)                     | mean  | β                            | (95% CI)              |
| Intercept                                                     |       | 5.44        | (-0.71 – 11.50)              |       | 1.45                         | (-2.11 – 4.99)        |
| Time                                                          |       | 0.23        | (-0.11 – 0.58)               |       | -0.24                        | (-0.52 – 0.04)        |
| Awake/Sleep ( <i>ilr</i> <sub>1</sub> )                       | -0.65 | -0.89       | (-10.35 – 8.44)              | -0.64 | -1.57                        | (-5.74 – 2.61)        |
| Work/Leisure ( <i>ilr</i> <sub>2</sub> )                      | -0.10 | -3.32       | (-9.83 – 3.14)               | -0.15 | -0.38                        | (-2.11 – 1.36)        |
| ≥30 %HRR Work/<30 %HRR Work ( <i>ilr</i> <sub>3</sub> )       | -0.65 | 2.06        | (-1.51 – 5.68)               | -0.72 | 0.67                         | (-0.85 – 2.19)        |
| ≥30% HRR Leisure/<30 %HRR Leisure ( <i>ilr</i> <sub>4</sub> ) | -1.01 | -1.28       | (-4.75 – 2.17)               | -1.12 | -2.57                        | (-5.19 – 0.03)        |
|                                                               |       |             |                              |       |                              |                       |
|                                                               |       |             | BMI <sup>‡</sup> <25         |       | BMI <sup>‡</sup> ≥25         |                       |
|                                                               |       |             | n = 35                       |       | n = 37                       |                       |
| 30% HRR                                                       | mean  | β           | (95% CI)                     | mean  | β                            | (95% CI)              |
| Intercept                                                     |       | 2.12        | (-1.85 – 6.06)               |       | <b>7.50</b>                  | <b>(3.30 – 11.70)</b> |
| Time                                                          |       | 0.07        | (-0.23 – 0.38)               |       | -0.06                        | (-0.38 – 0.27)        |
| Awake/Sleep ( <i>ilr</i> <sub>1</sub> )                       | -0.64 | -1.19       | (-5.97 – 3.57)               | -0.66 | 0.33                         | (-7.19 – 7.85)        |
| Work/Leisure ( <i>ilr</i> <sub>2</sub> )                      | -0.24 | -0.49       | (-3.12 – 2.14)               | -0.02 | -1.07                        | (-3.95 – 1.81)        |
| ≥30 %HRR Work/<30 %HRR Work ( <i>ilr</i> <sub>3</sub> )       | -0.63 | 0.45        | (-1.39 – 2.30)               | -0.74 | 1.68                         | (-0.80 – 4.18)        |
| ≥30% HRR Leisure/<30 %HRR Leisure ( <i>ilr</i> <sub>4</sub> ) | -1.00 | -1.68       | (-4.60 – 1.22)               | -1.12 | -0.59                        | (-3.39 – 2.19)        |
|                                                               |       |             |                              |       |                              |                       |
|                                                               |       |             | Control of work pacing <2.75 |       | Control of work pacing ≥2.75 |                       |
|                                                               |       |             | n = 32                       |       | n = 38                       |                       |
| 30% HRR                                                       | mean  | β           | (95% CI)                     | mean  | β                            | (95% CI)              |
| Intercept                                                     |       | <b>7.29</b> | <b>(1.02 – 13.53)</b>        |       | <b>3.99</b>                  | <b>(0.46 – 7.48)</b>  |
| Time                                                          |       | -0.14       | (-0.45 – 0.16)               |       | 0.22                         | (-0.09 – 0.53)        |
| Awake/Sleep ( <i>ilr</i> <sub>1</sub> )                       | -0.60 | 0.14        | (-9.58 – 9.83)               | -0.70 | -0.51                        | (-5.43 – 4.39)        |
| Work/Leisure ( <i>ilr</i> <sub>2</sub> )                      | -0.07 | -0.12       | (-3.45 – 3.20)               | -0.20 | -0.77                        | (-3.89 – 2.35)        |
| ≥30 %HRR Work/<30 %HRR Work ( <i>ilr</i> <sub>3</sub> )       | -0.39 | -0.19       | (-3.07 – 2.71)               | -0.98 | 1.31                         | (-0.96 – 3.58)        |
| ≥30% HRR Leisure/<30 %HRR Leisure ( <i>ilr</i> <sub>4</sub> ) | -0.98 | 0.63        | (-4.60 – 5.83)               | -1.13 | -1.13                        | (-3.35 – 1.07)        |
|                                                               |       |             |                              |       |                              |                       |
|                                                               |       |             | Construction                 |       | Healthcare                   |                       |
|                                                               |       |             | n = 35                       |       | n = 37                       |                       |
| 30% HRR                                                       | mean  | β           | (95% CI)                     | mean  | β                            | (95% CI)              |
| Intercept                                                     |       | <b>4.65</b> | <b>(1.02 – 8.26)</b>         |       | <b>6.15</b>                  | <b>(1.45 – 10.81)</b> |
| Time                                                          |       | 0.07        | (-0.22 – 0.37)               |       | -0.07                        | (-0.41 – 0.27)        |
| Awake/Sleep ( <i>ilr</i> <sub>1</sub> )                       | -0.58 | 0.09        | (-5.16 – 5.32)               | -0.71 | -1.21                        | (-8.75 – 6.31)        |
| Work/Leisure ( <i>ilr</i> <sub>2</sub> )                      | 0.01  | 0.82        | (-1.59 – 3.25)               | -0.25 | -2.57                        | (-6.55 – 1.39)        |
| ≥30 %HRR Work/<30 %HRR Work ( <i>ilr</i> <sub>3</sub> )       | -0.51 | 0.64        | (-1.11 – 2.39)               | -0.85 | 2.56                         | (-0.57 – 5.74)        |
| ≥30% HRR Leisure/<30 %HRR Leisure ( <i>ilr</i> <sub>4</sub> ) | -1.04 | -0.27       | (-2.63 – 2.09)               | -1.09 | -1.01                        | (-4.68 – 2.61)        |

¥ BMI (Body mass index)

**Table S3.** Models describing the association between time spent  $\geq 40$  %HRR and overall musculoskeletal pain (scale 0–27); stratified by VO<sub>2</sub>max, BMI, control of work pacing, and sector. Associations with  $p < 0.05$  are marked in bold.

| 40% HRR                                                              | VO <sub>2</sub> max < 34.8<br>n = 36 |             |                       | VO <sub>2</sub> max $\geq 34.8$<br>n = 36 |         |                |
|----------------------------------------------------------------------|--------------------------------------|-------------|-----------------------|-------------------------------------------|---------|----------------|
|                                                                      | mean                                 | $\beta$     | (95% CI)              | mean                                      | $\beta$ | (95% CI)       |
| Intercept                                                            |                                      | <b>7.49</b> | <b>(2.87 – 12.08)</b> |                                           | 0.60    | (-4.41 – 5.57) |
| Time                                                                 |                                      | 0.24        | (-0.11 – 0.58)        |                                           | -0.23   | (-0.52 – 0.04) |
| Awake/Sleep ( <i>ilr</i> <sub>1</sub> )                              | -1.19                                | -0.47       | (-9.64 – 8.59)        | -1.27                                     | -1.92   | (-6.42 – 2.58) |
| Work/Leisure ( <i>ilr</i> <sub>2</sub> )                             | -0.29                                | -2.15       | (-8.77 – 4.45)        | -0.13                                     | -0.56   | (-2.44 – 1.31) |
| $\geq 40$ %HRR Work/<40 %HRR Work ( <i>ilr</i> <sub>3</sub> )        | -2.16                                | 1.90        | (-3.99 – 7.85)        | -2.20                                     | 0.83    | (-1.26 – 2.90) |
| $\geq 40$ % HRR Leisure/<40 %HRR Leisure ( <i>ilr</i> <sub>4</sub> ) | -2.01                                | -0.86       | (-4.97 – 3.25)        | -2.36                                     | -1.54   | (-3.90 – 0.81) |

  

| 40% HRR                                                              | BMI <sup>‡</sup> <25<br>n = 35 |         |                | BMI <sup>‡</sup> $\geq 25$<br>n = 37 |             |                       |
|----------------------------------------------------------------------|--------------------------------|---------|----------------|--------------------------------------|-------------|-----------------------|
|                                                                      | mean                           | $\beta$ | (95% CI)       | mean                                 | $\beta$     | (95% CI)              |
| Intercept                                                            |                                | 1.67    | (-3.01 – 6.28) |                                      | <b>9.57</b> | <b>(5.14 – 13.99)</b> |
| Time                                                                 |                                | 0.08    | (-0.23 – 0.39) |                                      | -0.05       | (-0.38 – 0.27)        |
| Awake/Sleep ( <i>ilr</i> <sub>1</sub> )                              | -1.19                          | -1.69   | (-6.62 – 3.21) | -1.26                                | 0.21        | (-8.07 – 8.53)        |
| Work/Leisure ( <i>ilr</i> <sub>2</sub> )                             | -0.29                          | -0.30   | (-3.15 – 2.54) | -0.13                                | -1.20       | (-4.34 – 1.94)        |
| $\geq 40$ %HRR Work/<40 %HRR Work ( <i>ilr</i> <sub>3</sub> )        | -2.08                          | 0.64    | (-2.03 – 3.32) | -2.27                                | 1.77        | (-2.04 – 5.57)        |
| $\geq 40$ % HRR Leisure/<40 %HRR Leisure ( <i>ilr</i> <sub>4</sub> ) | -2.12                          | -0.93   | (-3.57 – 1.69) | -2.25                                | -0.58       | (-3.77 – 2.61)        |

  

| 40% HRR                                                              | Control of work pacing <2.75<br>n = 32 |             |                       | Control of work pacing $\geq 2.75$<br>n = 38 |             |                      |
|----------------------------------------------------------------------|----------------------------------------|-------------|-----------------------|----------------------------------------------|-------------|----------------------|
|                                                                      | mean                                   | $\beta$     | (95% CI)              | mean                                         | $\beta$     | (95% CI)             |
| Intercept                                                            |                                        | <b>8.70</b> | <b>(1.65 – 15.74)</b> |                                              | <b>4.15</b> | <b>(0.25 – 8.00)</b> |
| Time                                                                 |                                        | -0.14       | (-0.45 – 0.17)        |                                              | 0.22        | (-0.09 – 0.53)       |
| Awake/Sleep ( <i>ilr</i> <sub>1</sub> )                              | -1.11                                  | -0.70       | (-10.54 – 9.11)       | -1.34                                        | -0.84       | (-5.89 – 4.18)       |
| Work/Leisure ( <i>ilr</i> <sub>2</sub> )                             | 0.02                                   | 0.43        | (-2.94 – 3.79)        | -0.44                                        | -0.61       | (-3.78 – 2.57)       |
| $\geq 40$ %HRR Work/<40 %HRR Work ( <i>ilr</i> <sub>3</sub> )        | -1.80                                  | -0.40       | (-4.44 – 3.66)        | -2.56                                        | 1.31        | (-1.66 – 4.29)       |
| $\geq 40$ % HRR Leisure/<40 %HRR Leisure ( <i>ilr</i> <sub>4</sub> ) | -2.11                                  | 1.67        | (-2.88 – 6.22)        | -2.24                                        | -1.03       | (-3.35 – 1.30)       |

  

| 40% HRR                                                              | Construction<br>n = 35 |             |                      | Healthcare<br>n = 37 |             |                       |
|----------------------------------------------------------------------|------------------------|-------------|----------------------|----------------------|-------------|-----------------------|
|                                                                      | mean                   | $\beta$     | (95% CI)             | mean                 | $\beta$     | (95% CI)              |
| Intercept                                                            |                        | <b>4.43</b> | <b>(0.09 – 8.76)</b> |                      | <b>8.80</b> | <b>(3.92 – 13.66)</b> |
| Time                                                                 |                        | 0.07        | (-0.22 – 0.37)       |                      | -0.07       | (-0.41 – 0.27)        |
| Awake/Sleep ( <i>ilr</i> <sub>1</sub> )                              | -1.15                  | -0.33       | (-6.10 – 5.42)       | -1.30                | -0.80       | (-8.47 – 6.86)        |
| Work/Leisure ( <i>ilr</i> <sub>2</sub> )                             | 0.06                   | 0.54        | (-2.05 – 3.13)       | -0.46                | -2.40       | (-6.81 – 2.01)        |
| $\geq 40$ %HRR Work/<40 %HRR Work ( <i>ilr</i> <sub>3</sub> )        | -1.98                  | 0.31        | (-2.30 – 2.92)       | -2.37                | 2.95        | (-1.63 – 7.57)        |
| $\geq 40$ % HRR Leisure/<40 %HRR Leisure ( <i>ilr</i> <sub>4</sub> ) | -2.28                  | -0.14       | (-2.58 – 2.31)       | -2.09                | -1.25       | (-5.04 – 2.50)        |

<sup>‡</sup> BMI (Body mass index)
